# Supplementary material for: Genome-wide association study for calving performance using high-density genotypes in dairy and beef cattle
Source: PubMed Central journal article supplement (PMC4464877; doi:10.1186/s12711-015-0126-4), 2015-06-12
Supplement: 12711_2015_126_MOESM1_ESM.pdf [file 12711_2015_126_MOESM1_ESM.pdf]

## Additional file 1

Table S1: Bayes Factors (BF) and single-SNP regression p values for all SNPs with a BF greater than 200 for direct and maternal calving difficulty and a BF greater than 40 for perinatal mortality

|                                    | SNP index | SNP name               | Chr | Position  | MAF  | BF      | P value                |
|------------------------------------|-----------|------------------------|-----|-----------|------|---------|------------------------|
| <b>Direct Calving Difficulty</b>   |           |                        |     |           |      |         |                        |
| Holstein-                          | 4011      | ARS-BFGL-NGS-109285    | 18  | 57589121  | 0.08 | 1684.26 | $8.95 \times 10^{-10}$ |
| Friesian                           | 525264    | BovineHD1800016761     | 18  | 57548213  | 0.09 | 1523.56 | $8.95 \times 10^{-10}$ |
|                                    | 741177    | BovineHD4100008420     | 10  | 101721285 | 0.41 | 390.31  | $1.03 \times 10^{-5}$  |
|                                    | 378664    | BovineHD1200001026     | 12  | 3213665   | 0.25 | 253.84  | $3.37 \times 10^{-4}$  |
|                                    | 168233    | BovineHD0500000940     | 5   | 3768126   | 0.47 | 232.98  | $1.45 \times 10^{-4}$  |
|                                    | 217768    | BovineHD0600020010     | 6   | 72022013  | 0.38 | 223.73  | $9.91 \times 10^{-8}$  |
|                                    | 168231    | BovineHD0500000938     | 5   | 3764573   | 0.47 | 219.46  | $1.24 \times 10^{-3}$  |
| Charolais                          | 67815     | BovineHD0200001668     | 2   | 5725051   | 0.13 | 3310.78 | $1.59 \times 10^{-11}$ |
|                                    | 544037    | BovineHD1900018321     | 19  | 63376818  | 0.47 | 1561.23 | $3.16 \times 10^{-6}$  |
|                                    | 544036    | BovineHD1900018320     | 19  | 63376120  | 0.47 | 907.81  | $3.16 \times 10^{-6}$  |
|                                    | 533956    | BovineHD1900007134     | 19  | 24561933  | 0.22 | 762.86  | $1.06 \times 10^{-6}$  |
|                                    | 487931    | BovineHD1600022505     | 16  | 77709903  | 0.39 | 709.33  | $1.38 \times 10^{-5}$  |
|                                    | 761092    | BTB-01124458           | 13  | 6683656   | 0.39 | 620.87  | $1.21 \times 10^{-4}$  |
|                                    | 67816     | BovineHD0200001669     | 2   | 5731378   | 0.13 | 383.88  | $1.46 \times 10^{-11}$ |
|                                    | 398587    | BovineHD1200024296     | 12  | 83902896  | 0.14 | 370.53  | $4.96 \times 10^{-6}$  |
|                                    | 133777    | BovineHD0300034147     | 3   | 117328152 | 0.39 | 295.66  | $5.01 \times 10^{-4}$  |
|                                    | 253187    | BovineHD0700024774     | 7   | 84451146  | 0.27 | 267.28  | $1.63 \times 10^{-5}$  |
|                                    | 645696    | BovineHD2600004234     | 26  | 16849292  | 0.36 | 234.46  | $1.69 \times 10^{-6}$  |
|                                    | 631615    | BovineHD2500001020     | 25  | 4516912   | 0.17 | 229.69  | $8.5 \times 10^{-5}$   |
|                                    | 471782    | BovineHD1600005037     | 16  | 18561778  | 0.37 | 213.47  | $5.57 \times 10^{-5}$  |
|                                    | 645695    | BovineHD2600004233     | 26  | 16848801  | 0.36 | 209.57  | $1.69 \times 10^{-6}$  |
| Limousin                           | 103101    | BovineHD0300000138     | 3   | 657019    | 0.47 | 633.42  | $1.80 \times 10^{-6}$  |
| <b>Maternal calving difficulty</b> |           |                        |     |           |      |         |                        |
| Holstein-                          | 544242    | BovineHD1900018551     | 19  | 1942110   | 0.36 | 474.13  | $8.63 \times 10^{-5}$  |
| Friesian                           | 416314    | BovineHD1300016191     | 13  | 56557875  | 0.14 | 220.36  | $4.18 \times 10^{-11}$ |
| Charolais                          | 126362    | BovineHD0300026067     | 3   | 90597805  | 0.45 | 769.66  | $3.85 \times 10^{-6}$  |
|                                    | 126363    | BovineHD0300026068     | 3   | 90600368  | 0.47 | 700.57  | $4.85 \times 10^{-6}$  |
|                                    | 126361    | BovineHD0300026066     | 3   | 90596779  | 0.45 | 438.06  | $7.18 \times 10^{-6}$  |
|                                    | 88704     | BovineHD0200024474     | 2   | 85841490  | 0.27 | 306.54  | $9.47 \times 10^{-7}$  |
|                                    | 88708     | BovineHD0200024478     | 2   | 85872885  | 0.27 | 260.51  | $1.38 \times 10^{-6}$  |
|                                    | 88688     | BovineHD0200024458     | 2   | 85764305  | 0.27 | 241.09  | $9.47 \times 10^{-7}$  |
|                                    | 252315    | BovineHD0700023816     | 7   | 81801829  | 0.38 | 215.81  | $1.09 \times 10^{-5}$  |
|                                    | 770652    | Hapmap42056-BTA-108680 | 3   | 91136875  | 0.38 | 206.24  | $1.23 \times 10^{-4}$  |
| <b>Direct Perinatal Mortality</b>  |           |                        |     |           |      |         |                        |
| Holstein-Friesian                  | 644942    | BovineHD2600003337     | 26  | 12797274  | 0.32 | 40.25   | $8.90 \times 10^{-7}$  |
| Charolais                          | 198553    | BovineHD0500035019     | 5   | 119896486 | 0.36 | 52.13   | $2.83 \times 10^{-6}$  |
| Limousin                           | 750289    | BovineHD4100018377     | 27  | 37032811  | 0.24 | 127.36  | $6.62 \times 10^{-8}$  |
|                                    | 664893    | BovineHD2700010585     | 27  | 37023628  | 0.23 | 92.22   | $1.33 \times 10^{-7}$  |
|                                    | 664891    | BovineHD2700010583     | 27  | 37021710  | 0.23 | 88.02   | $1.33 \times 10^{-7}$  |
|                                    | 664898    | BovineHD2700010590     | 27  | 37031485  | 0.23 | 87.06   | $1.33 \times 10^{-7}$  |
|                                    | 664897    | BovineHD2700010589     | 27  | 37030084  | 0.23 | 84.49   | $1.33 \times 10^{-7}$  |
|                                    | 664890    | BovineHD2700010582     | 27  | 37019464  | 0.23 | 78.42   | $1.33 \times 10^{-6}$  |
|                                    | 664895    | BovineHD2700010587     | 27  | 37027959  | 0.23 | 77.78   | $1.33 \times 10^{-7}$  |
|                                    | 664894    | BovineHD2700010586     | 27  | 37026496  | 0.24 | 75.56   | $1.33 \times 10^{-7}$  |

---

|        |                    |    |          |      |       |                       |
|--------|--------------------|----|----------|------|-------|-----------------------|
| 664899 | BovineHD2700010591 | 27 | 37034231 | 0.23 | 72.55 | $1.33 \times 10^{-7}$ |
| 664885 | BovineHD2700010577 | 27 | 37007637 | 0.24 | 69.40 | $7.69 \times 10^{-8}$ |
| 664888 | BovineHD2700010580 | 27 | 37015031 | 0.24 | 67.05 | $7.69 \times 10^{-8}$ |

---

Table S2: Gene symbols cited within the manuscript and their corresponding gene name

| <b>Gene Symbol</b> | <b>Corresponding Name</b>                                                              |
|--------------------|----------------------------------------------------------------------------------------|
| ANKAR              | Ankyrin and armadillo repeat containing                                                |
| ASNSD1             | Asparagine synthetase domain containing 1                                              |
| C2H2orf88          | Chromosome 2 open reading frame, human C2orf88                                         |
| CEACAM18           | Carcinoembryonic antigen-related cell adhesion molecule 18                             |
| CLOCK              | Clock circadian regulator                                                              |
| CORIN              | Corin, serine peptidase                                                                |
| CROT               | Carnitine O-octanoyltransferase                                                        |
| CTU1               | Cytosolic thiouridylase subunit 1                                                      |
| DCAF6              | DDB1 and CUL4 associated factor 6                                                      |
| DENND6B            | DENN/MADD domain containing 6B                                                         |
| ENSBTAG00000004082 | Novel gene                                                                             |
| ENSBTAG00000019276 | Novel gene                                                                             |
| HDAC10             | Histone deacetylase 10                                                                 |
| HGF                | Hepatocyte growth factor (hepapoietin A; scatter factor)                               |
| HIBCH              | 3-hydroxyisobutyryl-CoA hydrolase                                                      |
| INPP1              | Inositol polyphosphate-1-phosphatase                                                   |
| KIAA1324-like      | KIAA1324-like ortholog                                                                 |
| MAPK11             | Mitogen-activated protein kinase 11                                                    |
| MAPK12             | Mitogen-activated protein kinase 12                                                    |
| MFSD6              | Major facilitator superfamily domain containing 6                                      |
| MSTN               | Myostatin                                                                              |
| ORMDL1             | ORMDL sphingolipid biosynthesis regulator 1                                            |
| OSGEPL1            | O-sialoglycoprotein endopeptidase-like 1, mRNA                                         |
| PCLO               | Piccolo presynaptic cytomatrix protein                                                 |
| PDYN               | Prodynorphin                                                                           |
| PLXNB2             | Plexin B2                                                                              |
| PMS1               | PMS1 postmeiotic segregation increased 1                                               |
| PPP6R2             | Protein phosphatase 6, regulatory subunit 2                                            |
| PRKCA              | Protein kinase C, alpha                                                                |
| SEMA3D             | Sema domain, immunoglobulin domain (Ig), short basic domain, secreted, (semaphorin) 3D |
| SIGLEC12           | Sialic acid binding Ig-like lectin 12                                                  |
| SIRPA              | Signal-regulatory protein alpha                                                        |
| SLC20A1            | Solute carrier family 20 (phosphate transporter), member 1                             |
| TMEM194B           | Transmembrane protein 194B                                                             |
| UST                | Uronyl-2-sulfotransferase                                                              |
| ZNF615             | Zinc finger protein 615                                                                |
